# Supplementary material
Source: PubMed Central journal article supplement (PMC2715473)
Supplement: 0905746106_0905746106SI.pdf [file 0905746106_0905746106SI.pdf]

# Supporting Information

Shabek et al. 10.1073/pnas.0905746106

**Materials.** Materials for SDS/PAGE and Bradford reagent were from Bio-Rad. L-[<sup>35</sup>S] methionine for in vitro translation and prestained molecular weight markers were obtained from GE Healthcare. <sup>125</sup>I for radiolabeling was from PerkinElmer. Tissue culture sera and media were from Biological Industries or Sigma. Mouse anti-HA (16B12) and mouse anti-Ub were from Covance, anti-Flag (M2) antibody was from Sigma, mouse anti-RGS-His was from Qiagen, and rabbit anti-p21 and anti-MyoD were from Santa Cruz. Anti-Mdm2 antibody (a mixture of 4B2 and 2A9 monoclonal antibodies) was kindly provided by Moshe Oren. Antibodies to the proteasome subunits were as follows: (i) mouse anti-human Rpt1 and rabbit anti-human  $\alpha 4$  were from Biomol; (ii) mouse anti- $\alpha 6$  (ABR PAI-963 or monoclonal antibody 2–17 to human PSMA1) was kindly provided by Keiji Tanaka; and (iii) rabbit anti-S12 (PSMD7) was from Affinity BioReagents. Rabbit anti-UBB<sup>+1</sup> was kindly provided by Fred van Leeuwen (1). Rabbit anti-Ub conjugates antibody have been described (2). Peroxidase-conjugated secondary antibodies were from Jackson ImmunoResearch Laboratories. Protein G-Agarose and immobilized anti-HA were from Roche Molecular Biochemicals. Ni-NTA agarose was from Qiagen. Ub, DTT, ATP, adenosine 5'-[ $\gamma$ -thiotriphosphate] (ATP $\gamma$ S), 2-deoxyglucose, phosphocreatine, creatine phosphokinase, and Tris buffer (Trizma base) were from Sigma. Hexokinase was from Roche Molecular Biochemicals. Protease inhibitors mixture and *N*-carbobenzoxy-L-leucyl-L-leucyl-leucinal (MG132) were from Calbiochem. Jet-PEI transfection reagent was from Polyplus Transfection. Ub aldehyde (Ubal) and *clasto*-Lactacystin were from Biomol. Reagents for ECL were from Pierce. TNT Wheat germ and *E. coli* T7 S30-based extract kits for coupled transcription-translation were from Promega. Suc-LLVY-AMC was from Bachem and Ub-AMC was from Biomol. Restriction enzymes were from New England Biolabs. All other reagents were of high analytical grade.

**Methods. Cultured cells.** HEK-293 and HeLa cells were grown at 37 °C in DMEM supplemented with 10% FCS and antibiotics (penicillin–streptomycin).

**Mammalian cell transfection.** Transient transfection of HEK-293 cells with expression vectors was carried out by using the jetPEI transfection reagent.

**Plasmids and protein purification.** All plasmids were constructed and manipulated by using standard molecular biological techniques. For cell expression, cDNAs were subcloned into pCS2 (Invitrogen; MyoD, c-MycHA, Mdm2, UBB<sup>+1</sup>HA, UBB<sup>+1/K29,48R</sup>, UBB<sup>+1/YK29,48R</sup>, UBB<sup>+1</sup>HA<sup>K29,48R</sup>), pIRES (Clontech; Flag-ODC and Flag-AZ), pcDNA3 (Invitrogen; UBB<sup>+1</sup> and UBB<sup>+1/K29,48R</sup>) or pCAGGS (3) (all other cDNAs coding for the different Ub<sup>VV</sup> variants). cDNAs used for in vitro translation were subcloned into pCS2 (MyoD, Ring1B, XIAP-1) or pCDNA3.1 (Invitrogen; all other cDNAs coding for the different Ub<sup>VV</sup> variants). For bacterial expression of Ub<sup>VV</sup>His and its different variants and mutants (cloned into pET14b, Novagen), plasmids were expressed in BL21 (pLysS) *E. coli* and proteins were purified by using Ni<sup>2+</sup>-NTA resin according to the manufacturer's instructions. Untagged Ub<sup>VV</sup> (cloned in pET14b) was expressed and purified as described (4). Bacterially expressed MyoD was purified as described (5).

**Protein concentration.** Protein concentration was measured by the method of Bradford (6) using BSA as standard.

**Preparation and fractionation of crude reticulocyte lysate.** Reticulocytes were induced in rabbits and lysates were prepared and fractionated over DEAE cellulose onto fraction I (that contains Ub and several E2s) and fraction II (that contains the remaining enzymes of the UPS, but lacks endogenous Ub) as described (7).

**Monitoring proteasomal DUB activity.** Proteasome-associated DUB activity was measured by using Ub-AMC as a substrate according to the manufacturer's instructions. Briefly, anti- $\alpha 6$ -immobilized proteasome (described in *Materials and Methods*) was preincubated for 10 min at 4 °C with 100 ng of Ubal or 5  $\mu$ g of Ub<sup>VV</sup>His or LLUb<sup>VV</sup>His in a volume of 50  $\mu$ L. Ub-AMC was added (to a final volume of 100  $\mu$ L), and the reaction mixture was incubated for an additional 15 min at 30 °C. Reactions were terminated with SDS, and fluorescence of the released AMC was determined.

**Monitoring 20S proteasome activity.** Proteasomal activity was measured by monitoring the cleavage of LLVY-AMC according to the manufacturer's instructions. Briefly, 0.3  $\mu$ g of purified 26S proteasome (Biomol) was preincubated at 37 °C with the indicated amounts/concentration of WT Ub, Ub<sup>VV</sup>His, and MG132 for 10 min in a volume of 10  $\mu$ L. LLVY-AMC was added for 10 min (to a final volume of 50  $\mu$ L), the reactions were quenched by the addition of SDS, and fluorescence of the released AMC was determined.

1. van Leeuwen FW, et al. (1998) Frameshift mutants of  $\beta$  amyloid precursor protein and ubiquitin-B in Alzheimer's and Down patients. *Science* 279:242–247.
2. Hershko A, Eytan E, Ciechanover A, Haas AL (1982) Immunochemical analysis of the turnover of ubiquitin-protein conjugates in intact cells: Relationship to the breakdown of abnormal proteins. *J Biol Chem* 257:13964–13970.
3. Niwa H, Yamamura K, Miyazaki J (1991) Efficient selection for high-expression transfectants with a novel eukaryotic vector. *Gene* 108:193–199.
4. Wu-Baer F, Lagazon K, Yuan W, Baer R (2003) The BRCA1/BARD1 heterodimer assembles polyubiquitin chains through an unconventional linkage involving lysine residue K6 of ubiquitin. *J Biol Chem* 278:34743–34746.

5. Breitschopf K, Bengal E, Ziv T, Admon A, Ciechanover A (1998) A novel site for ubiquitination: The N-terminal residue, and not internal lysines of MyoD, is essential for conjugation and degradation of the protein. *EMBO J* 17:5964–5973.
6. Bradford MM (1976) A rapid and sensitive method for the quantitation of microgram quantities of protein utilizing the principle of protein-dye binding. *Anal Biochem* 72:248–254.
7. Hershko A, Heller H, Elias S, Ciechanover A (1983) Components of ubiquitin-protein ligase system: Resolution, affinity purification, and role in protein breakdown. *J Biol Chem* 258:8206–8214.
